# Supplementary material for: Effects of propofol and etomidate anesthesia on cardiovascular miRNA expression: the different profiles?
Source: Springer Nature journal article supplement (doi:10.1186/s12871-018-0610-9), 2018-10-23

## Gene Function Classification (GO)

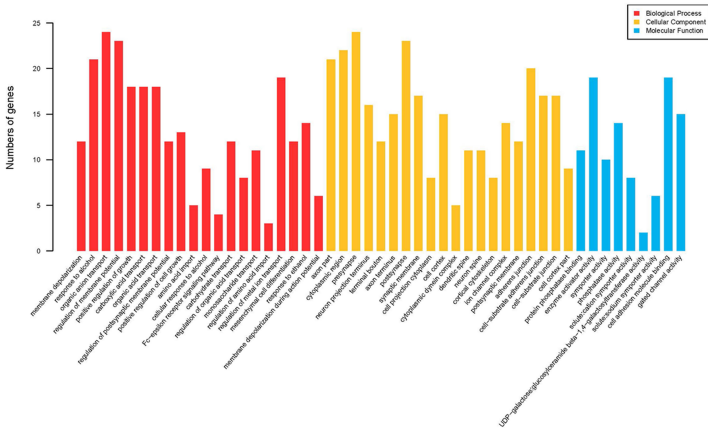

Supplement: MOESM5 [file 16220404]
